# Supplementary material for: Nano-contact microscopy of supracrystals
Source: publisher site journal article supplement (doi:10.3762/bjnano.6.126), 2015-05-29
Supplement: Additional file 1 [file 2190-4286-6-126-S1.pdf]

# Supporting Information

for

## Nano-contact microscopy of supracrystals

Adam Sweetman<sup>\*1</sup>, Nicolas Goubet<sup>2,3</sup>, Ioannis Lekkas<sup>1</sup>, Marie Paule Pileni<sup>2,3,4</sup> and Philip Moriarty<sup>1</sup>

Address: <sup>1</sup>The School of Physics and Astronomy, The University of Nottingham, Nottingham, NG7 2RD, U.K.; <sup>2</sup>Sorbonne Universités, UPMC Univ Paris 06, UMR 8233, Monaris, F-75005, Paris, France; <sup>3</sup>CNRS, UMR 8233, Monaris, F-75005, Paris, France and <sup>4</sup>CEA/IRAMIS, CEA Saclay, 91191, Gif-sur-Yvette, France

Email: Adam Sweetman - adam.sweetman@nottingham.ac.uk

\* Corresponding author

## Additional Experimental Data

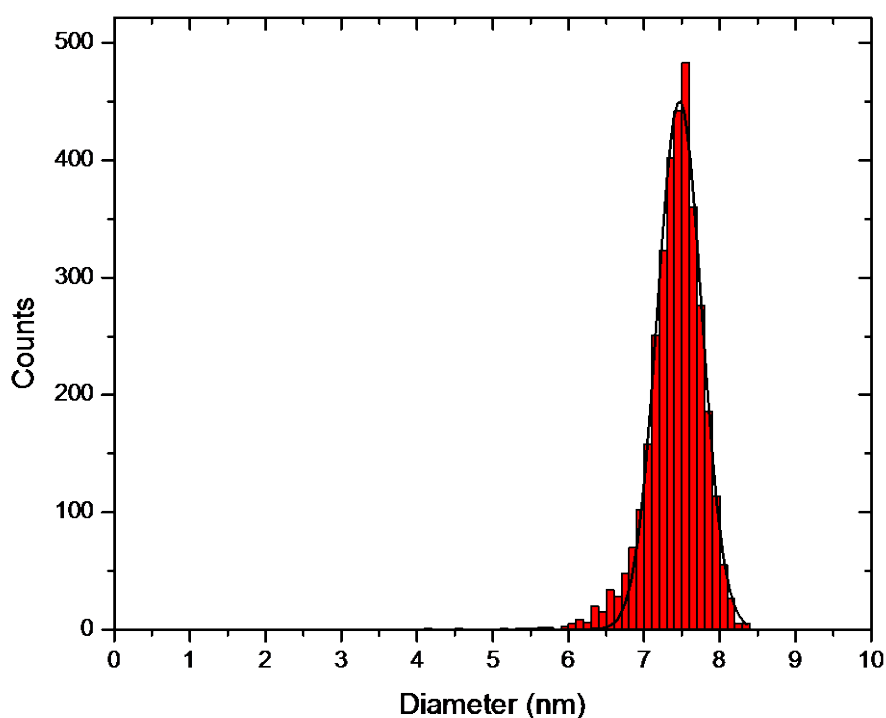

**Figure S1:** Size distribution of the gold nanocrystals used in our study. The dark curve represents a Gaussian fit with a mean diameter of 7.4 nm and polydispersity of 5%.

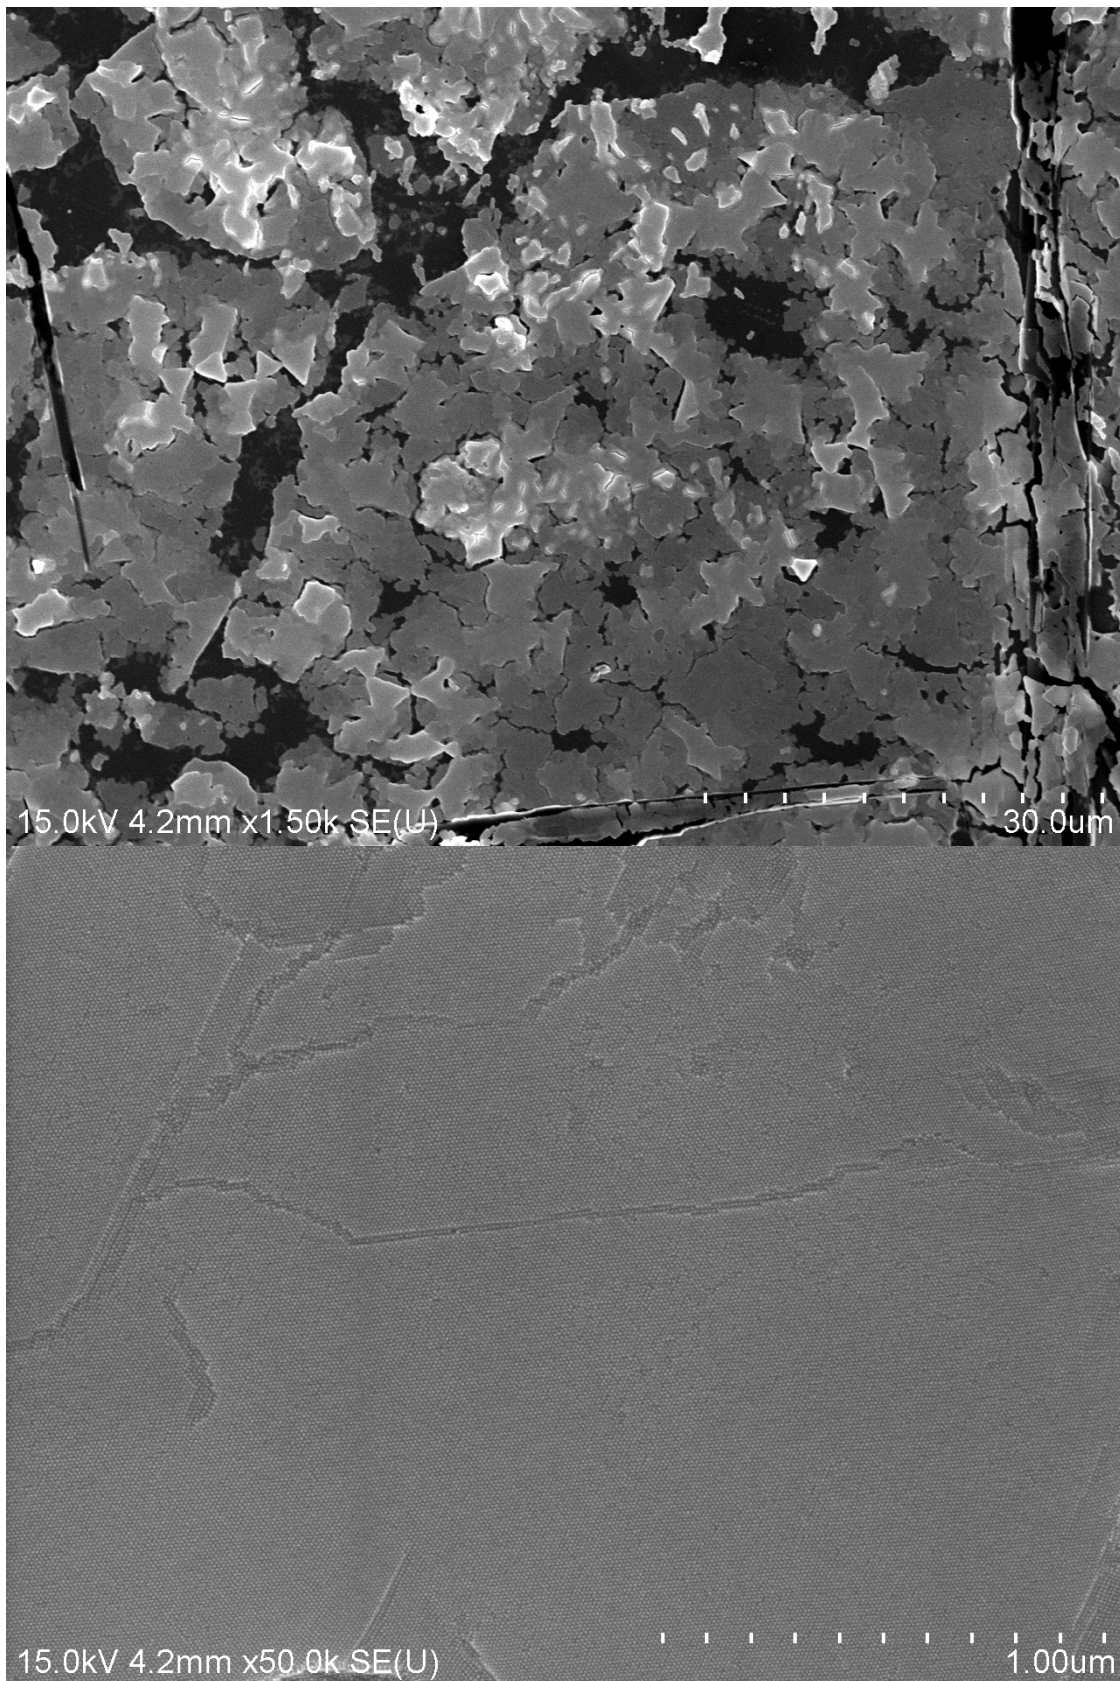

**Figure S2:** Low and high resolution scanning electron microscope images of the interfacial supracrystal made of gold nanocrystals.
